# Supplementary material for: Gas Protection of Two-Dimensional Nanomaterials from High-Energy Impacts
Source: PubMed Central journal article supplement (PMC5069545; doi:10.1038/srep35532), 2016-10-19
Supplement: srep35532-s1.pdf [file srep35532-s1.pdf]

Supplementary Information

# **Gas Protection of Two-Dimensional Nanomaterials from High-Energy Impacts**

Tan Xing<sup>1#</sup>, Srikanth Mateti<sup>1#</sup>, Luhua Li<sup>1</sup>, Fengxian Ma<sup>2</sup>, Aijun Du<sup>2</sup>, Yury Gogotsi<sup>3</sup> and Ying Chen<sup>1\*</sup>

<sup>1</sup>Institute for Frontier Materials, Deakin University, Waurn Ponds, Victoria 3216, Australia

<sup>2</sup>School of Chemistry, Physics and Mechanical Engineering, Queensland University of Technology, Brisbane, QLD 4001, Australia.

<sup>3</sup>A. J. Drexel Nanomaterials Institute, and Materials Science and Engineering Department, Drexel University 3141 Chestnut Street, Philadelphia, PA 19104 (USA)

#: these authors contribute equally; \*: corresponding author

Correspondence and requests for materials should be addressed to Y.C. (email: [ian.chen@deakin.edu.au](mailto:ian.chen@deakin.edu.au).)

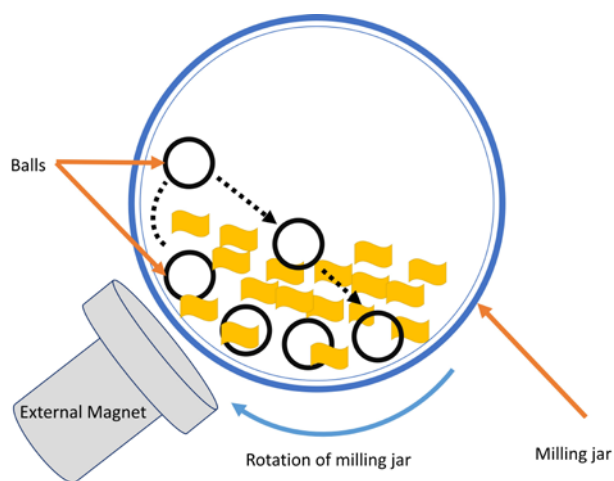

**Figure S1.** Schematic of high-energy ball milling device

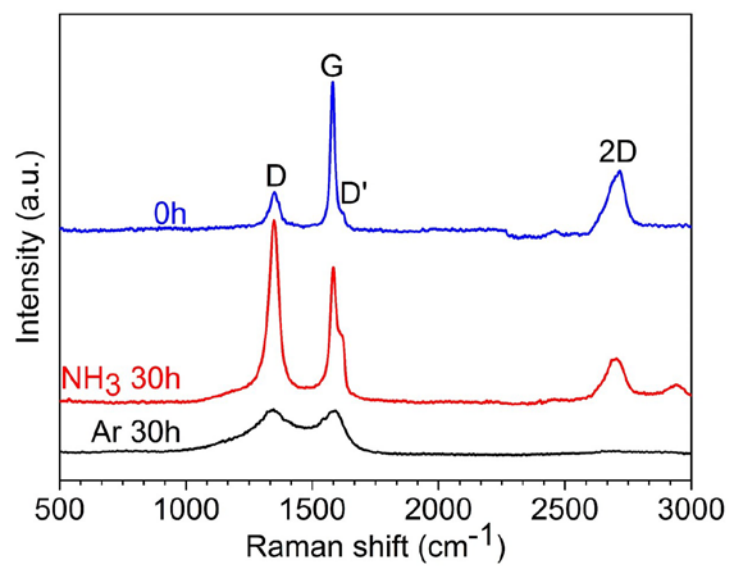

**Figure S2.** Raman spectra of graphite with and without ball milling treatment.

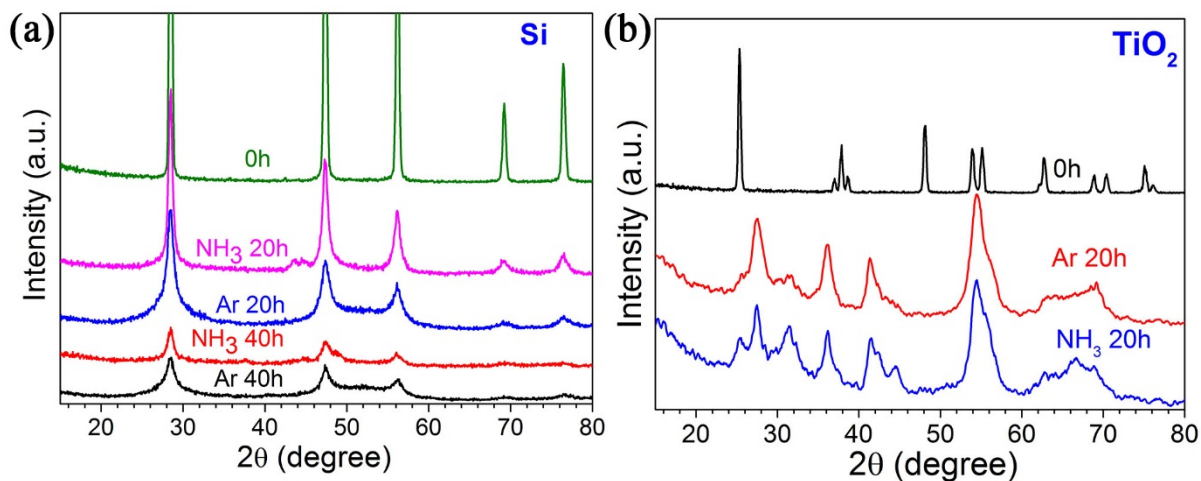

**Figure S3.** XRD patterns of Si (a) and TiO<sub>2</sub> (b) milled in different gases. The similar XRD patterns indicate the same structures produced in different gases.

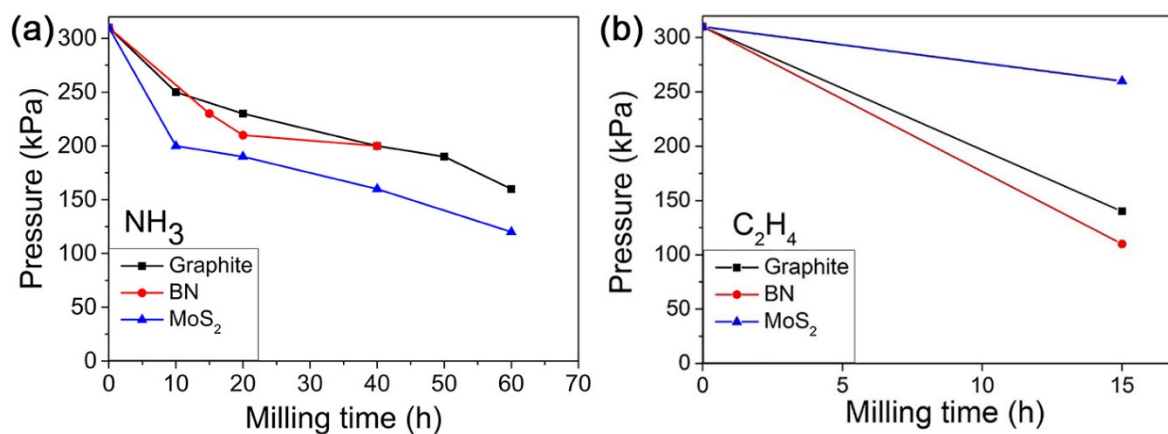

**Figure S4.** (a) NH<sub>3</sub> and (b) C<sub>2</sub>H<sub>4</sub> pressure change during milling of different materials. The pressure reduction in the sealed milling chamber indicates gas absorption into the milled materials continuously over the milling process.

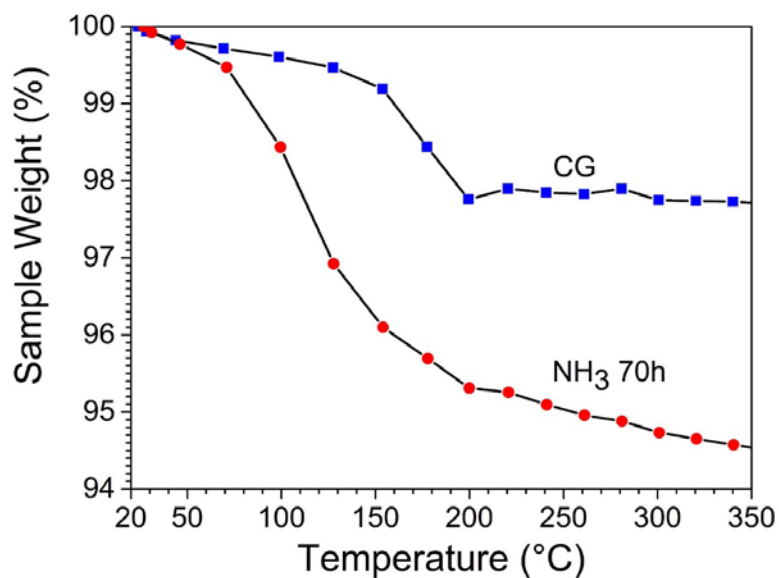

**Figure S5.** Thermal gravimetric (TG) curves of commercial graphite (CG) and the graphite milled for 70 h in NH<sub>3</sub> showing release of the adsorbed gases in different temperature ranges due to their different gas adsorption (physisorption or chemisorption) nature

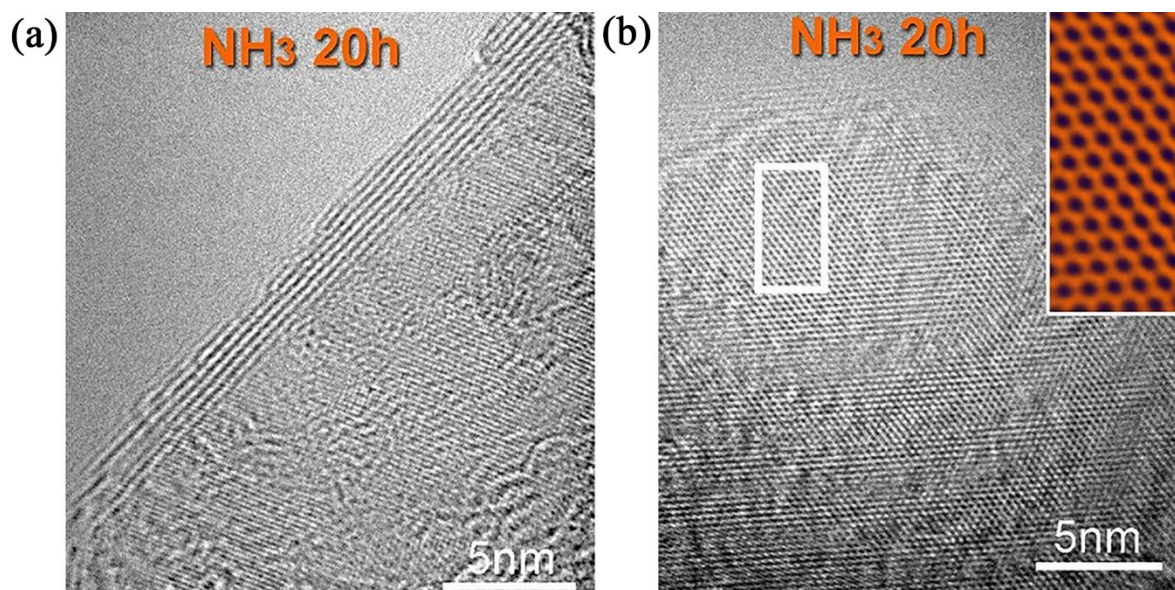

**Figure S6.** HR-TEM images of BN nanosheets produced by ball milling in NH<sub>3</sub> for 20 h.

(a) The edges of BN nanosheets; (b) in-plane structure. The inset shows the hexagonal rings from the reversed FFT image of part of (b).

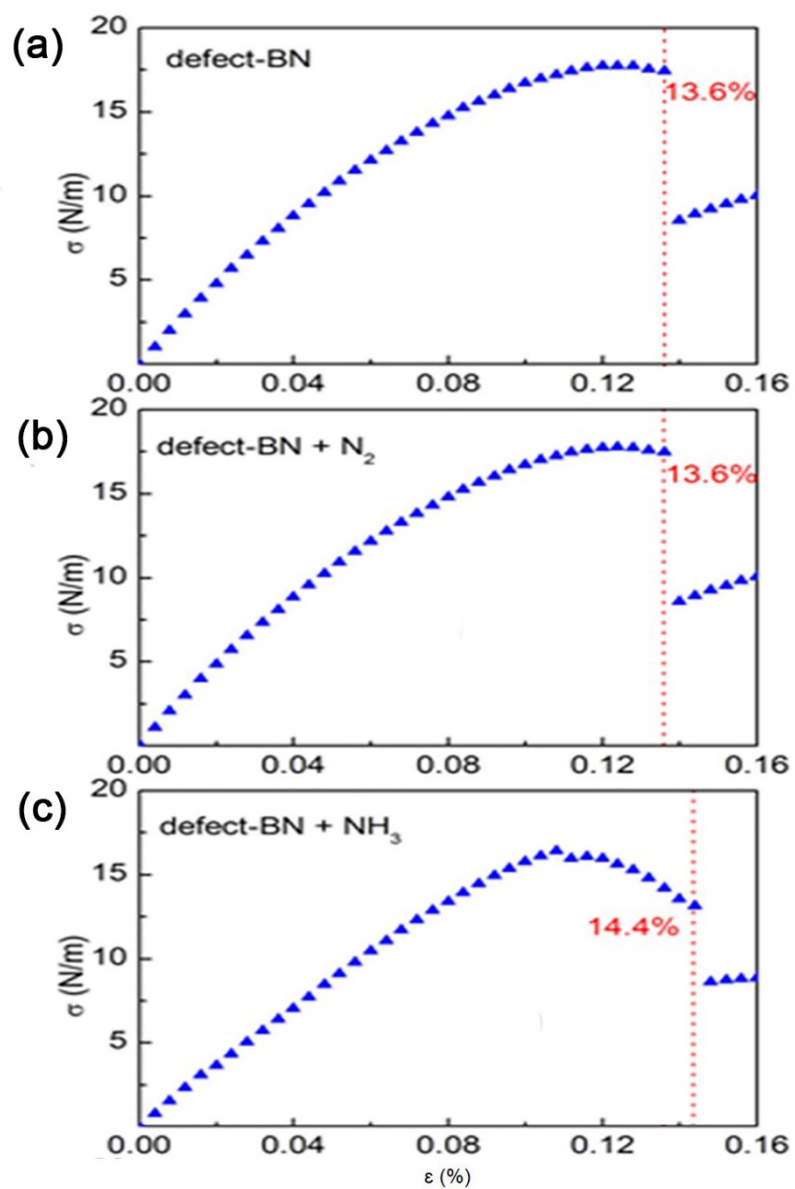

**Figure S7.** Simulated stress-strain curves for (a) a defected BN monolayer and a defected BN monolayer in the presence of (b)  $N_2$  and (c)  $NH_3$  attachment.
